# Supplementary figures and images for: Significance of Lipid Fatty Acid Composition for Resistance to Winter Conditions in Asplenium scolopendrium
Source: MDPI journal article supplement (doi:10.3390/biology11040507), 2022-03-25

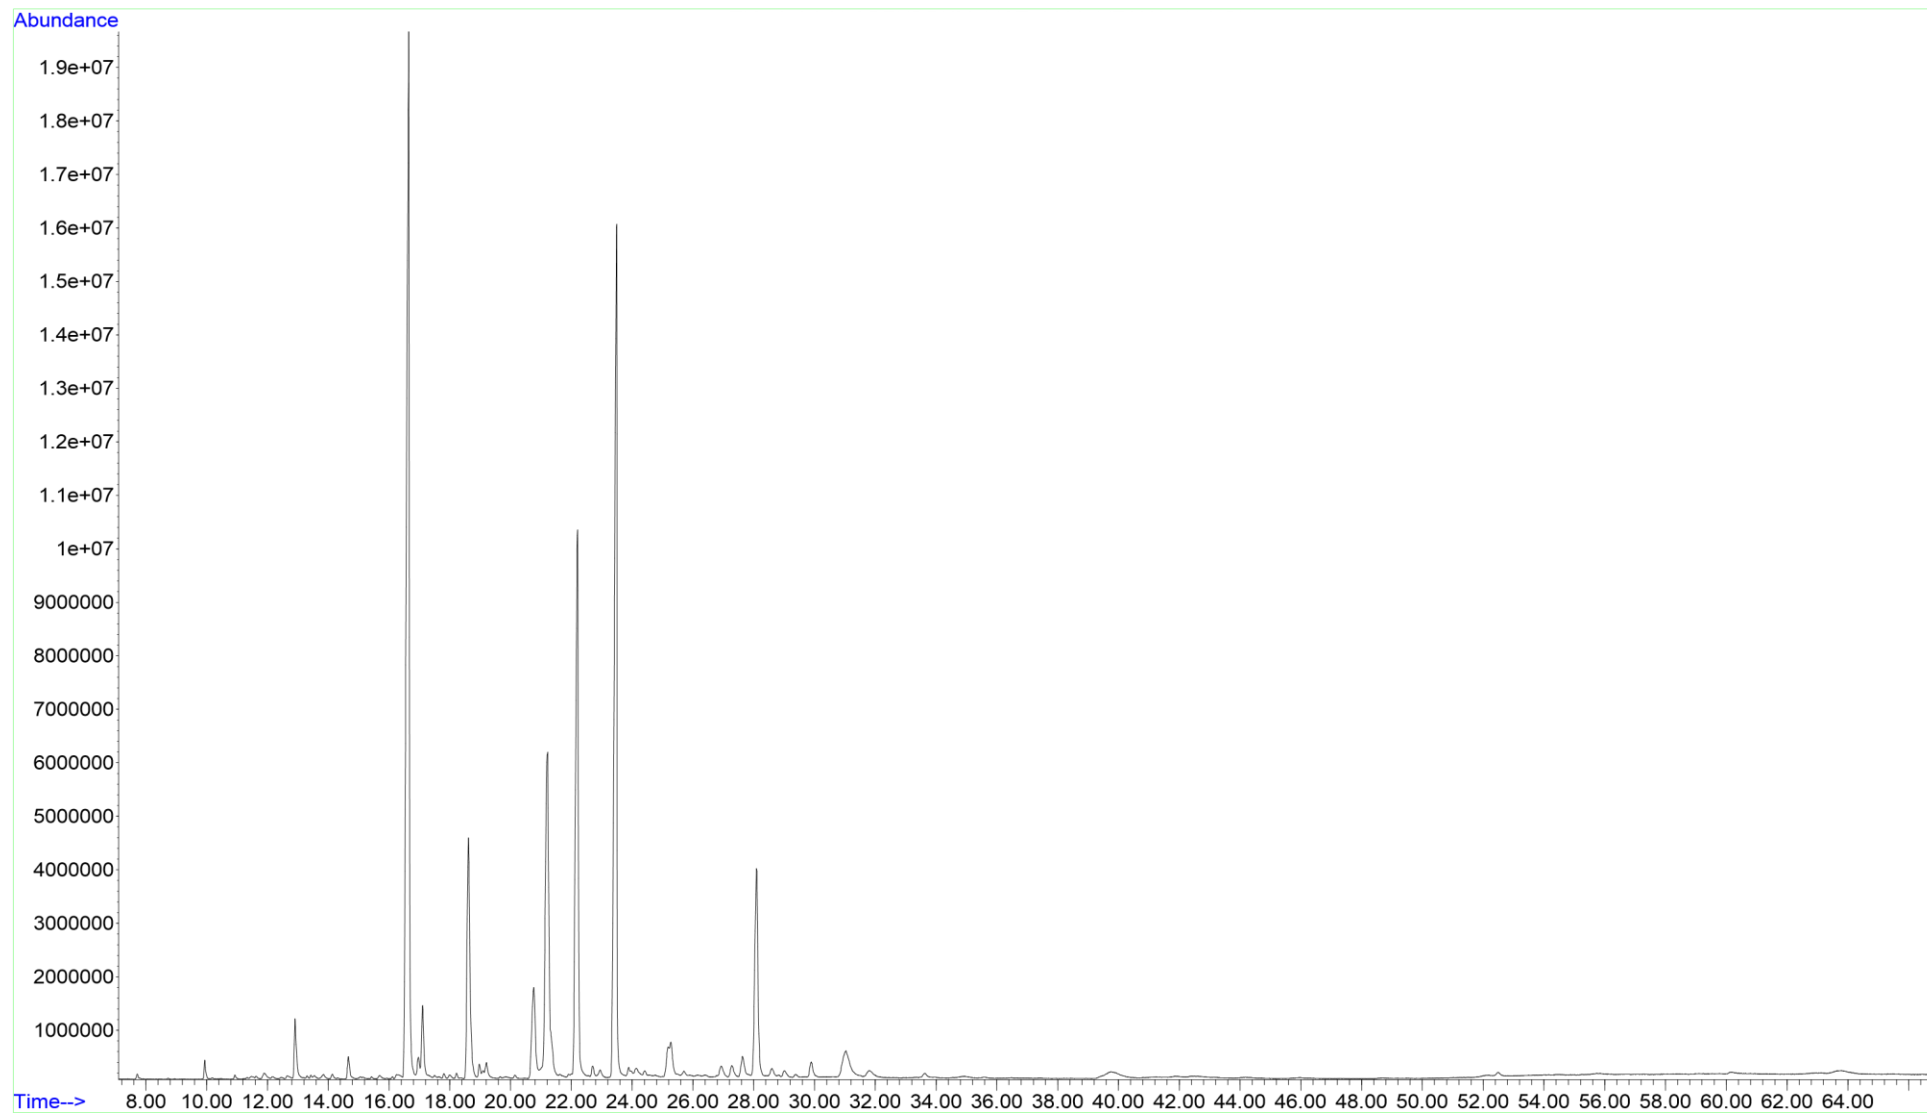

**Figure S2.** Chromatogram of *Asplenium scolopendrium* fatty acids.

Supplement: s1 [file s1]
